# Supplementary material
Source: publisher figshare collection journal article supplement (https://gsapubs.figshare.com/ndownloader/files/31651019)
Supplement: Supplementary file 1 [file 31651019]

## Sheet: Chronology Database C14.OSL.CN
Table S3. Synthesis of existing 10Be surface exposure ages, luminescence and minimum-limiting radiocarbon chronologies.
	Locality	Location Desciption	Latitude	Longitude			14C age	14C error	2σ lower	2σ upper	Median	Age	1σ uncertainty
Sample ID	(Fig . 1 Location)		(DD)	(DD)	Method	Dated Material	(years)	(years)	(cal yr BP)	(cal yr BP)	(cal yr BP)	(years)	(years)	Reference	Comment
ALT-MM-15-09	A	Foothills Erratics Train, AB	50.1366	-113.757	CN	Quartzite erratic	-	-	-	-		169500	11200	Margold et al., 2019	Regarded anomolous by author
ALT-MM-15-14	A	Foothills Erratics Train, AB	52.175	-114.87	CN	Quartzite erratic	-	-	-	-		22400	1600	Margold et al., 2019	Regarded anomolous by author
ALT-MM-15-01	A	Foothills Erratics Train, AB	49.1003	-112.223	CN	Granite erratic	-	-	-	-		17700	1200	Margold et al., 2019	Regarded anomolous by author-not regarded at part of FET not shield origin
ALT-MM-15-16	A	Foothills Erratics Train, AB	53.3807	-116.788	CN	Quartzite erratic	-	-	-	-		16300	1100	Margold et al., 2019
ALT-MM-15-10	A	Foothills Erratics Train, AB	50.3062	-113.872	CN	Quartzite erratic	-	-	-	-		15600	1000	Margold et al., 2019
ALT-MM-15-04	A	Foothills Erratics Train, AB	49.9625	-113.689	CN	Quartzite erratic	-	-	-	-		15500	1000	Margold et al., 2019
ALT-MM-15-15	A	Foothills Erratics Train, AB	52.1873	-114.882	CN	Quartzite erratic	-	-	-	-		15200	1000	Margold et al., 2019
ALT-MM-15-08	A	Foothills Erratics Train, AB	50.1025	-113.786	CN	Quartzite erratic	-	-	-	-		15100	1000	Margold et al., 2019
ALT-MM-15-05	A	Foothills Erratics Train, AB	49.9555	-113.837	CN	Quartzite erratic	-	-	-	-		15000	1000	Margold et al., 2019
ALT-MM-15-02	A	Foothills Erratics Train, AB	49.7785	-113.651	CN	Quartzite erratic	-	-	-	-		14700	1000	Margold et al., 2019
ALT-MM-15-03	A	Foothills Erratics Train, AB	49.7783	-113.651	CN	Quartzite erratic	-	-	-	-		14700	1000	Margold et al., 2019
ALT-MM-15-13	A	Foothills Erratics Train, AB	51.635	-114.479	CN	Quartzite erratic	-	-	-	-		14600	1000	Margold et al., 2019
ALT-MM-15-12	A	Foothills Erratics Train, AB	50.5313	-114.14	CN	Quartzite erratic	-	-	-	-		14500	1000	Margold et al., 2019
ALT-MM-15-07	A	Foothills Erratics Train, AB	49.9559	-113.836	CN	Quartzite erratic	-	-	-	-		14300	900	Margold et al., 2019
ALT-MM-15-11	A	Foothills Erratics Train, AB	50.3087	-113.872	CN	Quartzite erratic	-	-	-	-		14200	900	Margold et al., 2019
ALT-MM-15-06	A	Foothills Erratics Train, AB	49.9559	-113.836	CN	Quartzite erratic	-	-	-	-		8200	500	Margold et al., 2019	Regarded anomolous by author
UCIAMS-127348	B	Wally's Beach, AB	49.3386	-113.145	C14	Bone (Equua conversidens)	11470	35	13450	13246	13348	-	-	Waters et al., 2014	Ultrafiltered Collagen
UCIAMS-116400	B	Wally's Beach, AB	49.3386	-113.145	C14	Bone (Equua conversidens)	11465	40	13451	13241	13343	-	-	Waters et al., 2014	Ultrafiltered Collagen
UCIAMS-127352	B	Wally's Beach, AB	49.3386	-113.145	C14	Bone (Equua conversidens)	11475	30	13450	13255	13352	-	-	Waters et al., 2014	Ultrafiltered Collagen
UCIAMS-127350	B	Wally's Beach, AB	49.3386	-113.145	C14	Bone (Equua conversidens)	11460	30	13440	13243	13336	-	-	Waters et al., 2014	Ultrafiltered Collagen
UCIAMS-127355	B	Wally's Beach, AB	49.3386	-113.145	C14	Bone (Equua conversidens)	11465	30	13443	13246	13341	-	-	Waters et al., 2014	Ultrafiltered Collagen
UCIAMS-127351	B	Wally's Beach, AB	49.3386	-113.145	C14	Bone (Equua conversidens)	11440	30	13418	13190	13313	-	-	Waters et al., 2014	Ultrafiltered Collagen
UCIAMS-127353	B	Wally's Beach, AB	49.3386	-113.145	C14	Bone (Equua conversidens)	11440	30	13418	13190	13313	-	-	Waters et al., 2014	Ultrafiltered Collagen
TO-8972	B	Wally's Beach, AB	49.3167	-113.15	C14	Bone (Rangifer tarandus)	11350	80	13405	13099	13235	-	-	Morlan database (unpublished); cited in Dyke et al., 2003
UCIAMS-127354	B	Wally's Beach, AB	49.3386	-113.145	C14	Bone (Equua conversidens)	11430	30	13411	13183	13300	-	-	Waters et al., 2014	Ultrafiltered Collagen
TO-7696	B	Wally's Beach, AB	49.3167	-113.15	C14	Bone (Equus conversidens)	11330	80	13355	13093	13221	-	-	Hall, 1999; cited in Dyke et al., 2003
UCIAMS-127347	B	Wally's Beach, AB	49.3386	-113.145	C14	Bone (Equua conversidens)	11425	30	13406	13181	13293	-	-	Waters et al., 2014	Ultrafiltered Collagen
UCIAMS-127349	B	Wally's Beach, AB	49.3386	-113.145	C14	Bone (Equua conversidens)	11410	30	13343	13179	13272	-	-	Waters et al., 2014	Ultrafiltered Collagen
UCIAMS-127373	B	Wally's Beach, AB	49.3386	-113.145	C14	Bone (Bootherium bombifrons)	11320	30	13300	13121	13211	-	-	Waters et al., 2014
OxA-14273	C	Vauxhall, AB	50.083	-112	C14	Bone (Eques cf. E. conversidens)	11620	150	13790	13181	13486	-	-	Burns, 2010	Ultrafiltered Collagen
BSG-2143	C	Vauxhall, AB	50.083	-112	C14	Bone (camelops cf. hestermus)	10708	100	12837	12481	12693	-	-	Burns, 2010
RL-757	D	Calgary Region, AB	51.17	-114.42	C14	Bone (Bison)	11300	290	13783	12731	13211	-	-	Wilson & Churcher, 1978; cited in Dyke et al., 2003
GSC-613	D	Calgary Region, AB	50.9625	-114.017	C14	Bone (unspecified)	11370	170	13591	12916	13265	-	-	Wilson and Churcher, 1978; Wilson et al., 2008
TO-7694	D	Calgary Region, AB	50.9625	-114.017	C14	Bone (Bison)	11290	80	13327	13085	13191	-	-	Wilson et al., 2008
GSC-989	D	Calgary Region, AB	50.9625	-114.017	C14	Bone (unspecified)	11100	160	13297	12749	13004	-	-	Stalker, 1968; cited in Dyke et al., 2003
GSC-612	D	Calgary Region, AB	51.1805	-114.463	C14	Bone (Unspecified)	10760	160	13096	12191	12731	-	-	Burns, 1996; cited in Dyke et al., 2003
BSG-2141	D	Calgary Region, AB	51.087	-114.171	C14	Bone (Mammuthus sp.)	10743	100	12895	12489	12720	-	-	Burns, 2010
GSC-3065	D	Calgary Region, AB	50.9625	-114.017	C14	Bone (Bison)	10200	280	12725	11184	11908	-	-	Blake 1986; Wilson 1983; cited in Dyke et al., 2003
TO-7695	D	Calgary Region, AB	50.9625	-114.017	C14	Bone (Bison)	10090	70	11932	11339	11641	-	-	Wilson et al., 2008
OxA-11622	D	Calgary Region, AB	51.123	-114.247	C14	Bone (Bison)	7475	45	8373	8190	8285	-	-	Shapiro et al., 2004
OxA-11583	D	Calgary Region, AB	51.123	-114.247	C14	Bone (Bison)	7310	45	8193	8015	8106	-	-	Shapiro et al., 2004
OxA-11585	D	Calgary Region, AB	51.123	-114.247	C14	Bone (Bison)	6775	40	7680	7572	7625	-	-	Shapiro et al., 2004	Past 8ka cut off used for deglaciation of the SWLIS
SFU-0-264	E	Edson, AB	53.4919	-116.625	OSL/IRSL	Sand	-	-	-	-		14000	800	Wolfe et al., 2004
SFU-0-274	F	Lodgepole, AB	53.115	-115.244	OSL/IRSL	Sand	-	-	-	-		14100	1800	Wolfe et al., 2004
OxA-11274	G	Chetwynd, AB	55.683	-121.63	C14	Bone (Bison)	11240	70	13307	13010	13148	-	-	Shapiro et al., 2004	Ultrafiltered Collagen
AA43652	H	Bear Flat, AB	56.274	-121.229	C14	Bone (Taiga vole)	12567	49	15145	14545	14949	-	-	Hebda et al., 2008	Froese et al (2018) regarded as anomolous, date bounding mid-holocene charcoal ages, standard collagen
AA46353	H	Bear Flat, AB	56.274	-121.229	C14	Bone (Taiga vole)	11507	52	13490	13251	13383	-	-	Hebda et al., 2008
OxA-31358	I	Charlie Lake, BC	56.337	-120.995	C14	Plant (unidentified)	10635	50	12731	12496	12666	-	-	Pederson et al., 2016
OxA-12085	I	Charlie Lake, BC	56.2728	-120.944	C14	Bone (Bison)	10505	45	12679	12196	12545	-	-	Shapiro et al., 2004
UCIAMS 142221	I	Charlie Lake, BC	56.2728	-120.944	C14	Bone (Bison)	10440	40	12610	12101	12339	-	-	Heintzman et al., 2016	Ultrafiltered Collagen
UCIAMS-11346	I	Charlie Lake, BC	56.2728	-120.944	C14	Bone (Bison)	10435	25	12596	12104	12333	-	-	Heintzman et al., 2016	Ultrafiltered Collagen
UCIAMS-11347	I	Charlie Lake, BC	56.2728	-120.944	C14	Bone (Bison)	10430	30	12597	12102	12322	-	-	Heintzman et al., 2016	Ultrafiltered Collagen
OxA-12084	I	Charlie Lake, BC	56.2728	-120.944	C14	Bone (Bison)	10340	40	12466	11946	12172	-	-	Shapiro et al., 2004
UCIAMS 142219	I	Charlie Lake, BC	56.2728	-120.944	C14	Bone (Bison)	10285	40	12446	11828	12021	-	-	Heintzman et al., 2016	Ultrafiltered Collagen
UCIAMS 142220	I	Charlie Lake, BC	56.2728	-120.944	C14	Bone (Bison)	10290	40	12450	11831	12033	-	-	Heintzman et al., 2016	Ultrafiltered Collagen
UCIAMS 142222	I	Charlie Lake, BC	56.2728	-120.944	C14	Bone (Bison)	10260	40	12434	11769	11960	-	-	Heintzman et al., 2016	Ultrafiltered Collagen
OxA-10580	I	Charlie Lake, BC	56.2728	-120.944	C14	Bone (Bison)	10230	55	12436	11652	11914	-	-	Shapiro et al., 2004
UCIAMS 142218	I	Charlie Lake, BC	56.2728	-120.944	C14	Bone (Bison)	10170	40	11946	11642	11824	-	-	Heintzman et al., 2016	Ultrafiltered Collagen
UCIAMS 142217	I	Charlie Lake, BC	56.2728	-120.944	C14	Bone (Bison)	10060	35	11808	11360	11588	-	-	Heintzman et al., 2016	Ultrafiltered Collagen
UCIAMS 142223	I	Charlie Lake, BC	56.2728	-120.944	C14	Bone (Bison)	9980	40	11689	11265	11438	-	-	Heintzman et al., 2016	Ultrafiltered Collagen
OxA-32206	I	Charlie Lake, BC	56.337	-120.995	C14	Plant (unidentified)	9230	40	10508	10251	10390	-	-	Pederson et al., 2016
OxA-31360	I	Charlie Lake, BC	56.337	-120.995	C14	Plant Seed (Cyperus sp. + Carex sp.)	7900	45	8983	8593	8722	-	-	Pederson et al., 2016	Regarded anomolous by author
OxA-31361	I	Charlie Lake, BC	56.337	-120.995	C14	Plant Seed (Caryx cf.)	7255	40	8173	7979	8089	-	-	Pederson et al., 2016
UCIAMS 117382	J	Smoky River, AB	54.713	-118.509	C14	Bone (Bison)	10410	30	12584	12098	12290	-	-	Heintzman et al., 2016	Ultrafiltered Collagen
SFU-0-277	K	Grande Praire, AB	55.1098	-118.735	OSL/IRSL	Sand	-	-	-	-		14900	1000	Wolfe et al., 2004
SFU-0-278	K	Grande Praire, AB	55.1098	-118.735	OSL/IRSL	Sand	-	-	-	-		14200	900	Wolfe et al., 2004
SFU-0-265	K	Grande Praire, AB	55.1098	-118.735	OSL/IRSL	Sand	-	-	-	-		13700	1000	Wolfe et al., 2004
SFU-0-266	K	Grande Praire, AB	55.0878	-118.81	OSL/IRSL	Sand	-	-	-	-		13500	1000	Wolfe et al., 2004
SFU-0-276	K	Grande Praire, AB	55.1098	-118.735	OSL/IRSL	Sand	-	-	-	-		11800	800	Wolfe et al., 2004
GP02-OSL1	K	Grande Praire, AB	55.1098	-118.735	OSL/IRSL	Sand	-	-	-	-		11500	1000	Munyikwa et al., 2017
GP01-OSL2	K	Grande Praire, AB	55.1098	-118.735	OSL/IRSL	Sand	-	-	-	-		10500	800	Munyikwa et al., 2017
SFU-0-279	L	Watino, AB	55.7233	-117.537	OSL/IRSL	Sand	-	-	-	-		12900	800	Wolfe et al., 2004
WAT-408	M	Spring/ Boone Lake, AB	55.575	-119.425	C14	Gyttja	12650	320	15987	13878	14963	-	-	White et al., 1979; cited in Dyke et al., 2003	Date removed here-bulk
SFU-223	M	Spring/ Boone Lake, AB	55.575	-119.425	C14	Wood (Populus)	11700	260	14267	13087	13600	-	-	White et al., 1979; 1985; cited in Dyke et al., 2003	Froese et al (2018) regarded as anomolous
SFU-210	M	Spring/ Boone Lake, AB	55.51	-119.583	C14	Gyttja	10800	180	13160	12178	12772	-	-	White et al., 1979; cited in Dyke et al., 2003	Date removed here-bulk
OxA-31586	M	Spring/ Boone Lake, AB	55.5166	-119.583	C14	Plant (unidentified)	10175	45	11970	11622	11831	-	-	Pederson et al., 2016
OxA-31354	M	Spring/ Boone Lake, AB	55.5166	-119.583	C14	Plant (unidentified)	10105	50	11878	11400	11685	-	-	Pederson et al., 2016
OxA-31590	M	Spring/ Boone Lake, AB	55.5166	-119.583	C14	Plant (unidentified)	10105	45	11875	11401	11691	-	-	Pederson et al., 2016
OxA-31355	M	Spring/ Boone Lake, AB	55.5166	-119.583	C14	Plant (Sphagnaceae, cf. Sphagnum)	10080	55	11869	11341	11629	-	-	Pederson et al., 2016
OxA-31588	M	Spring/ Boone Lake, AB	55.5166	-119.583	C14	Plant (unidentified)	10040	45	11807	11326	11548	-	-	Pederson et al., 2016
OxA-31589	M	Spring/ Boone Lake, AB	55.5166	-119.583	C14	Plant (unidentified)	10045	45	11809	11332	11556	-	-	Pederson et al., 2016
OxA-31587	M	Spring/ Boone Lake, AB	55.5166	-119.583	C14	Plant (unidentified)	10010	45	11729	11277	11497	-	-	Pederson et al., 2016
OxA-31898	M	Spring/ Boone Lake, AB	55.5166	-119.583	C14	Plant (Grass)	7248	35	8170	7978	8081	-	-	Pederson et al., 2016
S-1964	N	Edmonton Region, AB	53.5833	-113.325	C14	Bone (Mammuthus)	22750	1650	31464	23805	27342	-	-	Burns, 1996; cited in Dyke et al., 2003	Date removed here-below till
AECV-538C	N	Edmonton Region, AB	53.5833	-113.325	C14	Bone (Mammuthus)	22820	520	28044	25964	27082	-	-	Burns, 1996; cited in Dyke et al., 2003	Date removed here-below till
AECV-1664C	N	Edmonton Region, AB	53.5833	-113.325	C14	Bone (Equus sp.)	21330	340	26377	24907	25617	-	-	Burns, 1996; cited in Dyke et al., 2003	Date removed here-below till
S-2385	N	Edmonton Region, AB	53.5	-113.5	C14	Bone (unidentified)	11345	420	14803	12199	13289	-	-	Rains & Welch, 1988; cited in Dyke et al., 2003	Date removed here-ultrafiltered collagen dates from same site preferred
AECV-1203C	N	Edmonton Region, AB	53.5	-113.75	C14	Bone (Bison)	11620	170	13980	13127	13490	-	-	Burns, 1996; cited in Dyke et al., 2003	Date removed here-ultrafiltered collagen dates from same site preferred
OxA-12900	N	Edmonton Region, AB	53.6417	-113.283	C14	Bone (Panthra leo atrox)	11355	55	13333	13118	13235	-	-	Barnett et al., 2009; Burns 2010	Ultrafiltered Collagen
UCIAMS 117399	N	Edmonton Region, AB	53.596	-113.35	C14	Bone (Bison)	11255	45	13239	13092	13147	-	-	Heintzman et al., 2016	Ultrafiltered Collagen
UCIAMS 125537	N	Edmonton Region, AB	53.596	-113.35	C14	Bone (Bison)	11140	25	13156	12991	13087	-	-	Heintzman et al., 2016	Ultrafiltered Collagen
UCIAMS 125527	N	Edmonton Region, AB	53.596	-113.35	C14	Bone (Bison)	11110	25	13100	12928	13055	-	-	Heintzman et al., 2016	Ultrafiltered Collagen
UCIAMS 125531	N	Edmonton Region, AB	53.596	-113.35	C14	Bone (Bison)	11115	25	13103	12929	13065	-	-	Heintzman et al., 2016	Ultrafiltered Collagen
UCIAMS 125526	N	Edmonton Region, AB	53.596	-113.35	C14	Bone (Bison)	11100	25	13098	12926	13035	-	-	Heintzman et al., 2016	Ultrafiltered Collagen
UCIAMS 125532	N	Edmonton Region, AB	53.596	-113.35	C14	Bone (Bison)	11100	30	13098	12926	13028	-	-	Heintzman et al., 2016	Ultrafiltered Collagen
UCIAMS 125533	N	Edmonton Region, AB	53.596	-113.35	C14	Bone (Bison)	11105	25	13100	12926	13043	-	-	Heintzman et al., 2016	Ultrafiltered Collagen
UCIAMS 125541	N	Edmonton Region, AB	53.596	-113.35	C14	Bone (Bison)	11085	35	13095	12911	13014	-	-	Heintzman et al., 2016	Ultrafiltered Collagen
UCIAMS 117388	N	Edmonton Region, AB	53.596	-113.35	C14	Bone (Bison)	11075	30	13090	12915	13010	-	-	Heintzman et al., 2016	Ultrafiltered Collagen
UCIAMS 117391	N	Edmonton Region, AB	53.596	-113.35	C14	Bone (Bison)	11080	35	13094	12909	13010	-	-	Heintzman et al., 2016	Ultrafiltered Collagen
UCIAMS 117392	N	Edmonton Region, AB	53.596	-113.35	C14	Bone (Bison)	11080	35	13094	12909	13010	-	-	Heintzman et al., 2016	Ultrafiltered Collagen
UCIAMS 125528	N	Edmonton Region, AB	53.596	-113.35	C14	Bone (Bison)	11080	25	13091	12923	13016	-	-	Heintzman et al., 2016	Ultrafiltered Collagen
UCIAMS 117390	N	Edmonton Region, AB	53.596	-113.35	C14	Bone (Bison)	11040	30	13080	12846	12977	-	-	Heintzman et al., 2016	Ultrafiltered Collagen
UCIAMS 125544	N	Edmonton Region, AB	53.596	-113.35	C14	Bone (Bison)	11050	25	13081	12900	12989	-	-	Heintzman et al., 2016	Ultrafiltered Collagen
UCIAMS 125529	N	Edmonton Region, AB	53.596	-113.35	C14	Bone (Bison)	11030	25	13074	12844	12965	-	-	Heintzman et al., 2016	Ultrafiltered Collagen
UCIAMS 125540	N	Edmonton Region, AB	53.596	-113.35	C14	Bone (Bison)	11010	25	13065	12837	12928	-	-	Heintzman et al., 2016	Ultrafiltered Collagen
UCIAMS 117384	N	Edmonton Region, AB	53.631	-113.305	C14	Bone (Bison)	10530	30	12667	12479	12544	-	-	Heintzman et al., 2016	Ultrafiltered Collagen
UCIAMS 117400	N	Edmonton Region, AB	53.631	-113.305	C14	Bone (Bison)	10060	30	11805	11398	11591	-	-	Heintzman et al., 2016	Ultrafiltered Collagen
HC1-OSL1	O	F. Assin./ H. Cross/ Windfall	54.2913	-114.871	OSL/IRSL	Sand	-	-	-	-		18300	1200	Munyikwa et al., 2011	Regarded anomolous by author
SFU-0-275	O	F. Assin./ H. Cross/ Windfall	54.1992	-114.871	OSL/IRSL	Sand	-	-	-	-		15700	1600	Wolfe et al., 2004
HC2-OSL1	O	F. Assin./ H. Cross/ Windfall	54.2913	-114.871	OSL/IRSL	Sand	-	-	-	-		15300	1300	Munyikwa et al., 2011
FA3-OSL1	O	F. Assin./ H. Cross/ Windfall	54.3695	-114.639	OSL/IRSL	Sand	-	-	-	-		15000	1300	Munyikwa et al., 2011
SFU-0-262	O	F. Assin./ H. Cross/ Windfall	54.2913	-114.871	OSL/IRSL	Sand	-	-	-	-		14900	1000	Wolfe et al., 2004
FA2-OSL1	O	F. Assin./ H. Cross/ Windfall	54.3695	-114.639	OSL/IRSL	Sand	-	-	-	-		14600	1700	Munyikwa et al., 2011
SFU-0-263	O	F. Assin./ H. Cross/ Windfall	54.3695	-114.639	OSL/IRSL	Sand	-	-	-	-		14500	1000	Wolfe et al., 2004
HC1-OSL3	O	F. Assin./ H. Cross/ Windfall	54.2913	-114.871	OSL/IRSL	Sand	-	-	-	-		13500	1000	Munyikwa et al., 2011
FA3-OSL4	O	F. Assin./ H. Cross/ Windfall	54.3695	-114.639	OSL/IRSL	Sand	-	-	-	-		13100	900	Munyikwa et al., 2011
SFU-0-261	P	Nelson Lake, AB	54.4853	-112.285	OSL/IRSL	Sand	-	-	-	-		14500	900	Wolfe et al., 2004
SM5-OSL3	Q	Chisholm/ Decrene/ Hondo, AB	55.106	-114.001	OSL/IRSL	Sand	-	-	-	-		20300	1800	Munyikwa et al., 2013	Regarded anomolous by author
SM5-OSL1	Q	Chisholm/ Decrene/ Hondo, AB	55.106	-114.001	OSL/IRSL	Sand	-	-	-	-		18200	1200	Munyikwa et al., 2013	Regarded anomolous by author
SM3-OSL1	Q	Chisholm/ Decrene/ Hondo, AB	55.106	-114.001	OSL/IRSL	Sand	-	-	-	-		15400	1100	Munyikwa et al., 2013
SFU-0-260	Q	Chisholm/ Decrene/ Hondo, AB	54.8472	-114.285	OSL/IRSL	Sand	-	-	-	-		15300	800	Wolfe et al., 2004
SM3-OSL3	Q	Chisholm/ Decrene/ Hondo, AB	55.106	-114.001	OSL/IRSL	Sand	-	-	-	-		14900	1100	Munyikwa et al., 2013
DEC01-OSL4	Q	Chisholm/ Decrene/ Hondo, AB	55.1135	-114.157	OSL/IRSL	Sand	-	-	-	-		14800	1600	Munyikwa et al., 2017
SFU-0-259	Q	Chisholm/ Decrene/ Hondo, AB	55.1135	-114.157	OSL/IRSL	Sand	-	-	-	-		14800	900	Wolfe et al., 2004
SM07-OSL8	Q	Chisholm/ Decrene/ Hondo, AB	55.106	-114.001	OSL/IRSL	Sand	-	-	-	-		14300	1000	Munyikwa et al., 2017
SFU-0-258	Q	Chisholm/ Decrene/ Hondo, AB	55.106	-114.001	OSL/IRSL	Sand	-	-	-	-		14200	700	Wolfe et al., 2004
SM08-OSL3	Q	Chisholm/ Decrene/ Hondo, AB	55.106	-114.001	OSL/IRSL	Sand	-	-	-	-		13800	1000	Munyikwa et al., 2017
SM5-OSL5	Q	Chisholm/ Decrene/ Hondo, AB	55.106	-114.001	OSL/IRSL	Sand	-	-	-	-		13300	1200	Munyikwa et al., 2013
SM4-OSL1	Q	Chisholm/ Decrene/ Hondo, AB	55.106	-114.001	OSL/IRSL	Sand	-	-	-	-		13200	1100	Munyikwa et al., 2013
SM14-OSL2	Q	Chisholm/ Decrene/ Hondo, AB	55.106	-114.001	OSL/IRSL	Sand	-	-	-	-		13100	1500	Munyikwa et al., 2017
DEC02-OSL3	Q	Chisholm/ Decrene/ Hondo, AB	55.1135	-114.157	OSL/IRSL	Sand	-	-	-	-		13000	1400	Munyikwa et al., 2017
SM07-OSL4	Q	Chisholm/ Decrene/ Hondo, AB	55.106	-114.001	OSL/IRSL	Sand	-	-	-	-		12900	1300	Munyikwa et al., 2017
SM08-OSL9	Q	Chisholm/ Decrene/ Hondo, AB	55.106	-114.001	OSL/IRSL	Sand	-	-	-	-		12900	1400	Munyikwa et al., 2017
DEC03-OSL2	Q	Chisholm/ Decrene/ Hondo, AB	55.1135	-114.157	OSL/IRSL	Sand	-	-	-	-		12200	1500	Munyikwa et al., 2017
CH01-OSL2	Q	Chisholm/ Decrene/ Hondo, AB	54.8472	-114.285	OSL/IRSL	Sand	-	-	-	-		12100	1000	Munyikwa et al., 2017
LLB1-OSL2	R	Lac La Biche, AB	54.9905	-112.153	OSL/IRSL	Sand	-	-	-	-		14700	1600	Munyikwa et al., 2013
SFU-0-257	R	Lac La Biche, AB	54.9905	-112.153	OSL/IRSL	Sand	-	-	-	-		12600	600	Wolfe et al., 2004
ETH-29215	S	Stony Mountain Region, AB	56.2079	-111.428	C14	Wood	42540	780	46800	44116	45221	-	-	Fisher et al., 2009	Regarded anomolous by author
ETH-29216	S	Stony Mountain Region, AB	56.2079	-111.428	C14	Wood	34980	390	40935	39408	40155	-	-	Fisher et al., 2009	Regarded anomolous by author
GSC-2038	S	Stony Mountain Region, AB	55.95	-112.017	C14	Gyttja	11300	110	13447	12998	13205	-	-	Mott, 1974; cited in Dyke et al., 2003	Date removed here-bulk
ETH-32167	S	Stony Mountain Region, AB	56.3178	-111.929	C14	Peaty fragments	37820	520	42677	41622	42196	-	-	Fisher et al., 2009	Regarded anomolous by author
ETH-32165	S	Stony Mountain Region, AB	55.9491	-112.026	C14	Wood	10310	75	12471	11831	12131	-	-	Fisher et al., 2009
ETH-30185	S	Stony Mountain Region, AB	56.1272	-111.356	C14	Wood	9985	110	11869	11206	11501	-	-	Fisher et al., 2009
Beta-200072	S	Stony Mountain Region, AB	56.1272	-111.356	C14	Wood	10040	50	11809	11320	11549	-	-	Fisher et al., 2009
Beta-200071	S	Stony Mountain Region, AB	56.1272	-111.356	C14	Wood	10030	50	11805	11311	11534	-	-	Fisher et al., 2009
ETH-30173	S	Stony Mountain Region, AB	56.1272	-111.356	C14	Plant	9940	70	11700	11219	11391	-	-	Fisher et al., 2009
ETH-30172	S	Stony Mountain Region, AB	56.1272	-111.356	C14	Wood	9835	75	11609	11101	11256	-	-	Fisher et al., 2009
ETH-28525	S	Stony Mountain Region, AB	56.1272	-111.356	C14	Wood	9795	75	11401	10810	11217	-	-	Fisher et al., 2009
ETH-28526	S	Stony Mountain Region, AB	56.1272	-111.356	C14	Wood	9730	65	11260	10795	11149	-	-	Fisher et al., 2009
ETH-29206	S	Stony Mountain Region, AB	56.1272	-111.356	C14	Wood	9710	70	11249	10784	11113	-	-	Fisher et al., 2009
ETH-29207	S	Stony Mountain Region, AB	56.1272	-111.356	C14	Wood	9705	75	11249	10777	11100	-	-	Fisher et al., 2009
ETH-28524	S	Stony Mountain Region, AB	56.2079	-111.428	C14	Charcoal	9635	75	11201	10747	10964	-	-	Fisher et al., 2009
ETH-30596	S	Stony Mountain Region, AB	56.2368	-111.434	C14	Wood	9625	60	11189	10761	10955	-	-	Fisher et al., 2009
ETH-30183	S	Stony Mountain Region, AB	56.2079	-111.428	C14	Plant	8705	70	10110	9536	9682	-	-	Fisher et al., 2009
GSC-4821	T	Gipsy Lake Region, AB	56.4078	-110.55	C14	Gyttja	10600	120	12760	12061	12568	-	-	Anderson and Lewis, 1992; cited in Dyke et al., 2003	Date removed here-bulk
Beta-194058	T	Gipsy Lake Region, AB	56.2953	-111.042	C14	Wood	10270	50	12453	11817	11997	-	-	Fisher et al., 2009
Beta-194059	T	Gipsy Lake Region, AB	56.2953	-111.042	C14	Wood	10080	40	11816	11401	11639	-	-	Fisher et al., 2009
ETH-30177	T	Gipsy Lake Region, AB	56.3255	-110.857	C14	Wood	10030	75	11814	11270	11540	-	-	Fisher et al., 2009
ETH-29219	T	Gipsy Lake Region, AB	56.3255	-110.857	C14	Wood	10020	75	11812	11266	11527	-	-	Fisher et al., 2009
UCIAMS 34698	T	Gipsy Lake Region, AB	56.4078	-110.55	C14	Wood fragments	10000	35	11690	11279	11476	-	-	Teller, 2007 (unpublished)	Date removed here-bulk
ETH-30187	T	Gipsy Lake Region, AB	56.2953	-111.042	C14	Wood	9910	75	11689	11200	11356	-	-	Fisher et al., 2009
ETH-28535	T	Gipsy Lake Region, AB	56.2953	-111.042	C14	Wood	9820	70	11601	10896	11238	-	-	Fisher et al., 2009
ETH-28536	T	Gipsy Lake Region, AB	56.2953	-111.042	C14	Wood	9795	70	11398	10877	11217	-	-	Fisher et al., 2009
ETH-30176	T	Gipsy Lake Region, AB	56.3255	-110.857	C14	Wood	9375	70	11057	10305	10597	-	-	Fisher et al., 2009
ETH-29221	T	Gipsy Lake Region, AB	56.3829	-110.286	C14	Wood	8895	70	10206	9731	10007	-	-	Fisher et al., 2009
ETH-28534	T	Gipsy Lake Region, AB	56.3829	-110.286	C14	Wood	7760	65	8716	8401	8531	-	-	Fisher et al., 2009
FMc01-OSL1	U	Fort McMurray, AB	56.6528	-111.795	OSL/IRSL	Sand	-	-	-	-		14000	1000	Munyikwa et al., 2017
ETH-30586	V	Lower Athabasca Region, AB	57.2662	-112.597	C14	Wood	10460	65	12665	12055	12378	-	-	Fisher et al., 2009
GX-5301-II	V	Lower Athabasca Region, AB	57.1	-111.75	C14	Wood	10310	29	12450	11937	12064	-	-	Smith and Fisher, 1993; cited in Dyke et al., 2003
ETH-30585	V	Lower Athabasca Region, AB	57.2662	-112.597	C14	Wood	10210	65	12441	11413	11886	-	-	Fisher et al., 2009
GX-5036-I	V	Lower Athabasca Region, AB	57.1	-111.75	C14	Wood	10015	32	11710	11316	11502	-	-	Smith and Fisher, 1993; cited in Dyke et al., 2003
ETH-30590	V	Lower Athabasca Region, AB	57.2611	-112.283	C14	Charcoal	9850	65	11605	11167	11264	-	-	Fisher et al., 2009
GX-5031-I	V	Lower Athabasca Region, AB	57.1	-111.75	C14	Wood	9860	23	11316	11210	11250	-	-	Smith and Fisher, 1993; cited in Dyke et al., 2003
ETH-30591	V	Lower Athabasca Region, AB	57.2611	-112.283	C14	Wood	9730	65	11260	10795	11149	-	-	Fisher et al., 2009
AECV-439C	W	Bushe River, AB	58.3	-117	C14	Bone (Bison)	10080	150	12442	11215	11657	-	-	Beaudoin, 1988;; cited in Dyke et al., 2003
Beta-194061	X	Canadian Shield, SK	57.159	-108.752	C14	Wood	19250	80	23697	22967	23154	-	-	Fisher et al., 2009	Regarded anomolous by author
ETH-30175	X	Canadian Shield, SK	56.9275	-107.97	C14	Wood	9665	75	11225	10765	11014	-	-	Fisher et al., 2009
Beta-194055	X	Canadian Shield, SK	56.9275	-107.97	C14	Wood	9520	40	11075	10607	10849	-	-	Fisher et al., 2009
GSC-4832	X	Canadian Shield, SK	57.2144	-109.057	C14	Wood	9230	120	10729	10187	10419	-	-	Anderson, in GSC Paper 91; cited in Dyke et al., 2003
ETH-29211	X	Canadian Shield, SK	56.9275	-107.97	C14	Wood	9000	70	10279	9898	10152	-	-	Fisher et al., 2009
ETH-28529	X	Canadian Shield, SK	56.9275	-107.97	C14	Wood	8975	60	10240	9906	10119	-	-	Fisher et al., 2009
Beta-194057	X	Canadian Shield, SK	56.9275	-107.97	C14	Wood	8850	40	10160	9734	9958	-	-	Fisher et al., 2009
ETH-28530	X	Canadian Shield, SK	56.9275	-107.97	C14	Wood	8660	70	9892	9530	9639	-	-	Fisher et al., 2009
ETH-29220	X	Canadian Shield, SK	56.8227	-107.939	C14	Wood	8345	70	9524	9131	9350	-	-	Fisher et al., 2009
ETH-29222	X	Canadian Shield, SK	56.8227	-107.939	C14	Wood	7800	65	8930	8415	8576	-	-	Fisher et al., 2009
ETH-29223	X	Canadian Shield, SK	56.8227	-107.939	C14	Wood	7730	65	8635	8391	8505	-	-	Fisher et al., 2009
Quarry 1-60	Y	Clearwater Lower Athabasca Spillway, AB	57.1957	-111.534	OSL/IRSL	Fluvial sand	-	-	-	-		14500	1100	Woywitka et al., 2019	Regarded anomolous by author
Quarry 1-98	Y	Clearwater Lower Athabasca Spillway, AB	57.1957	-111.534	OSL/IRSL	Fluvial sand	-	-	-	-		12800	1200	Woywitka et al., 2019	Regarded anomolous by author
NWFH 3-125	Y	Clearwater Lower Athabasca Spillway, AB	57.2858	-111.523	OSL/IRSL	Eolian sand	-	-	-	-		12300	1400	Woywitka et al., 2019
NWFH 3-55	Y	Clearwater Lower Athabasca Spillway, AB	57.2858	-111.523	OSL/IRSL	Eolian sand	-	-	-	-		12200	1300	Woywitka et al., 2019
Quarry 1-25	Y	Clearwater Lower Athabasca Spillway, AB	57.1957	-111.534	OSL/IRSL	Eolian sand	-	-	-	-		12200	1100	Woywitka et al., 2019
Shell 1-70	Y	Clearwater Lower Athabasca Spillway, AB	57.2858	-111.523	OSL/IRSL	Eolian sand	-	-	-	-		12000	1000	Woywitka et al., 2019
UTS-1	Y	Clearwater Lower Athabasca Spillway, AB	57.7842	-111.559	OSL/IRSL	Eolian sand	-	-	-	-		11100	1300	Woywitka et al., 2019
FHNW 1-100	Y	Clearwater Lower Athabasca Spillway, AB	57.4923	-111.533	OSL/IRSL	Eolian sand	-	-	-	-		10100	1000	Woywitka et al., 2019
SAW05-01	Z	H. Level/ La Crete, AB	58.5183	-117.126	OSL/IRSL	Sand	-	-	-	-		13400	1200	Wolfe et al., 2007
HL01-OSL3	Z	H. Level/ La Crete, AB	58.5183	-117.126	OSL/IRSL	Sand	-	-	-	-		11900	900	Munyikwa et al., 2017
SAW05-02	Z	H. Level/ La Crete, AB	58.5183	-117.126	OSL/IRSL	Sand	-	-	-	-		11700	1000	Wolfe et al., 2007
LC01-OSL-1	Z	H. Level/ La Crete, AB	58.1692	-116.587	OSL/IRSL	Sand	-	-	-	-		11700	900	Munyikwa et al., 2017
SAW05-04	Z	H. Level/ La Crete, AB	58.5183	-117.126	OSL/IRSL	Sand	-	-	-	-		11000	1000	Wolfe et al., 2007
SAW05-03	Z	H. Level/ La Crete, AB	58.5183	-117.126	OSL/IRSL	Sand	-	-	-	-		10300	1000	Wolfe et al., 2007
GSC-4302	AA	Athabasca Delta, AB	58.25	-111.417	C14	Wood	9910	190	12418	10736	11441	-	-	Rhine and Smith, 1988; cited in Dyke et al., 2003
GSC-3402	AA	Athabasca Delta, AB	58.25	-111.417	C14	Wood	9910	90	11730	11192	11378	-	-	Smith and Fisher, 1993; cited in Dyke et al., 2003
AECV-1183C	AA	Athabasca Delta, AB	58.25	-111.417	C14	Wood	9710	130	11597	10600	11064	-	-	Smith and Fisher, 1993; cited in Dyke et al., 2003
References
Anderson, T.W., and Lewis, C.F.M., 1992, Evidence for ice margin retreat and proglacial lake (Agassiz?) drainage by about 11 ka, Clearwater River spillway area, Saskatch- ewan, in Current research, Part B: Geological Survey of Canada Paper 92-1B, p. 7-11.
Barnett, Ross, Beth Shapiro, I. A. N. Barnes, Simon YW Ho, Joachim Burger, Nobuyuki Yamaguchi, Thomas FG Higham et al. 2009 Phylogeography of lions (Panthera leo ssp.) reveals three distinct taxa and a late Pleistocene reduction in genetic diversity. Molecular ecology 18(8):1668-1677.
Blake, W., Jr (1986). Geological Survey of Canada Radiocarbon Dates XXV. Geological Survey of Canada, Paper 85-7, 32 pp.
Burns, James A. 1996 Vertebrate paleontology and the alleged ice-free corridor: the meat of the matter.Quaternary International 32: 107-112
Burns, James A. 2010 Mammalian faunal dynamics in late Pleistocene Alberta, Canada. Quaternary International217(1): 37-42
Dyke, A.S., Moore, A., Robertson, L., 2003. Deglaciation ofNorth America. Geological Survey of Canada, Ottawa
Fisher, T.G., Waterson, N., Lowell, T. V., Hajdas, I., 2009. Deglaciation ages and meltwater routing in the Fort McMurray region, northeastern Alberta and northwestern Saskatchewan, Canada. Quat. Sci. Rev. 28, 1608–1624. https://doi.org/10.1016/j.quascirev.2009.02.003
Hall, D. 1999 Alberta Scientists Track Mammoths Across recently Exposed Landscape. Mammoth Trumpet 14(4):1-6
Hebda, Richard J., James A. Burns, Marten Geertsema, and AJ Timothy Jull. 2008 AMS-dated late 2008 Pleistocene taiga vole (Rodentia: Microtus xanthognathus) from northeast British Columbia, Canada: a cautionary lesson in chronology. Canadian Journal of Earth Sciences 45(5): 611-618.
Heintzman, P.D., Froese, D., Ives, J.W., Soares, A.E.R., Zazula, G.D., Letts, B., Andrews, T.D., et al., 2016. Bison phy- logeography constrains dispersal and viability of the Ice Free Cor- ridor in western Canada. Proceedings ofthe National Academy of Sciences USA 113, 8057–8063
Margold, Martin, John C. Gosse, Alan J. Hidy, Robin J. Woywitka, Joseph M Young, and Duane Froese. 2019. Beryllium-10 dating of the foothills Erratics Train in Alberta, Canada, indicated detachment of the Laurentide Ice Sheet from the Rocky Mountains at ~15 ka BP. Quaternary Research, in press
Mott, R.J., 1973. Palynological Studies in Central Saskatchewan: Pollen Stratigraphy from Lake Sediment Sequences. Geological Survey of Canada, Ottawa.
Munyikwa, K., Feathers, J.K., Rittenour, T.M., Shrimpton, H.K., 2011. Constraining the late Wisconsinan retreat of the Laurentide ice sheet fromwestern Canada using luminescence ages from post- glacial aeolian dunes. Quaternary Geochronology 6, 407–422
Munyikwa, K., Rittenour, T.M., Feathers, J.K., 2017. Temporal con- straints for the late Wisconsinan deglaciation of western Canada using eolian dune luminescence chronologies fromAlberta. Palae- ogeography, Palaeoclimatology, Palaeoecology 470, 147–16
Pedersen, Mikkel W., Anthony Ruter, Charles Schweger, Harvey Friebe, Richard A. Staff, Kristian K. Kjeldsen, Marie LZ Mendoza et al. 2016 Postglacial viability and colonization in North America’s ice-free corridor. Nature 537(7618): 45-49.
Rhine, J.L., and Smith, D.G., 1988, Sedimentol- ogy and paraglacial eolian influence of the late Pleistocene Athabasca fan-delta, northeast Alberta, Canada, in Nemec, W., and Steel, R., eds., Fan-deltas, sedimentology and tec- tonic settings: London, Blackie, p. 158-169.
Shapiro, Beth, Alexei J. Drummond, Andrew Rambaut, Michael C. Wilson, Paul E. Matheus, Andrei V. Sher, Oliver G. Pybus et al.2004 Rise and fall of the Beringian steppe bison. Science 306(5701): 1561-1565
Smith, D.G., Fisher, T.G., 1993. Glacial Lake Agassiz: The northwest outlet and paleoflood. Geol. 21. 9–12.
Stalker, A. M. (1968) Identification of Saskatchewan Gravels and Sands. Canadian Journal of Earth Sciences. 5: 155-163.
Waters, Michael R., Thomas W. Stafford, Brian Kooyman, and L. V. Hills. 2015 Late Pleistocene horse and camel hunting at the southern margin of the ice-free corridor: Reassessing the age of Wally’s Beach, Canada. Proceedings of the National Academy of Sciences 112(14): 4263-4267.
White, James M., Rolf W. Mathewes, and William H. Mathews. 1985 Late Pleistocene chronology and environment of the “Ice-Free Corridor” of northwestern Alberta. Quaternary Research 249(2): 173-186.
White, J.M., Mathewes, R.W., Mathews, W.H., 1979. Radiocarbon dates from Boone Lake and their relation to the ‘ice-free corridor’ in the Peace River District of Alberta, Canada. Canadian Journal ofEarth
Wilson, M.C. (1983). Once upon a river: archaeology and geology of the Bow River valley at Calgary, Alberta, Canada. Ottawa, National Museum of Man Mercury Series. Archaeological Survey of Canada Paper, 114.
Wilson, Michael, and Charles S. Churcher. 1978 Late Pleistocene Camelops from the Gallelli pit, Calgary, Alberta: morphology and geologic setting. Canadian Journal of Earth Sciences 15(5): 729-740.
Wilson, Michael C., Leonard V. Hills, and Beth Shapiro. 2008. Late Pleistocene northward-dispersing Bison antiquus from the Bighill Creek Formation, Gallelli gravel pit, Alberta, Canada, and the fate of Bison occidentalis. Canadian Journal of Earth Sciences 45(7): 827-859.
Wolfe, S., Huntley, D., Ollerhead, J., 2004. Relict late Wisconsinan dune fields ofthe northern Great Plains, Canada. Géographie phy- sique et Quaternaire 58, 323–336.
Wolfe, S.A., Paulen, R.C., Smith, I.E.R., Lamothe, M., 2007. Age and palaeoenvironmental significance of Late Wisconsinan dune fields in the Mount Watt and Fontas River map areas, northern Alberta and British Columbia. Geol. Surv. Can. Curr. Res. 2007-B4.
Woywitka, 2019. Geoarchaeology of the Mineable Oil Sands Region, Northeastern Alberta, Canada [Ph.D. thesis]: Edmonton, University of Alberta

## Sheet: G49493
Norris, S.L., et al., 2022, Rapid retreat of the southwestern Laurentide Ice Sheet during the Bølling-Allerød interval: Geology, https://doi.org/10.1130/G49493.1
